# Supplementary material for: Calling Star Alleles With Stargazer in 28 Pharmacogenes With Whole Genome Sequences
Source: PubMed Central journal article supplement — Clin Pharmacol Ther. 2019 Jul 26;106(6):1328–37. doi: 10.1002/cpt.1552 (PMC6896231; doi:10.1002/cpt.1552), 2019-07-26

**Figure S2 Three gene copies detected by Stargazer for the *CYP3A4*, *CYP3A5*, *UGT2B7*, and *UGT2B15* genes in a single sample (NA18540).** Panels display Stargazer’s result for copy number analysis for the sample NA18540. Genotypes from GeT-RM and Stargazer (abbreviated as “G” and “S” for brevity) are also shown. Grey dots in each panel indicate the sample’s copy number estimates computed from read depth. The navy solid line and the cyan dashed line represent copy number profiles for each haplotype. Thick colored lines represent copy number profiles for different genes for both haplotypes combined. Each panel contains gene names and scaled gene models, in which exons and introns are depicted with colored boxes and black lines, respectively. This result is indicative of trisomy in chromosomes 4 and 7, and has been independently confirmed by Redon et al., 2006.

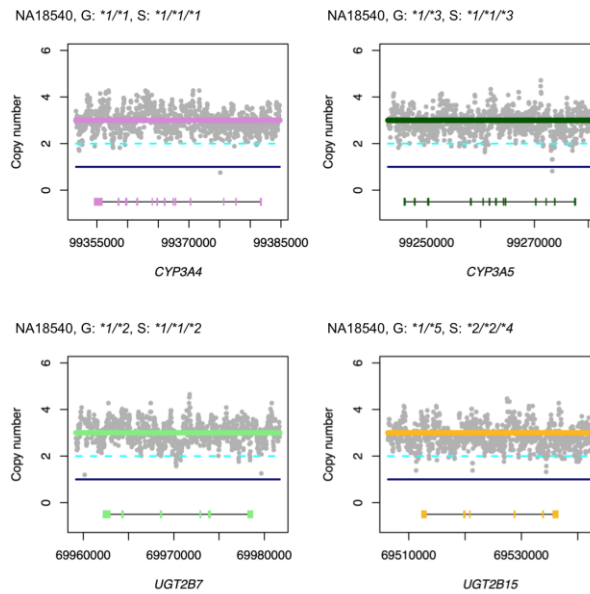

Supplement: CPT-106-1328-s002.pdf [file CPT-106-1328-s002.pdf]
