# Supplementary material for: Calling Star Alleles With Stargazer in 28 Pharmacogenes With Whole Genome Sequences
Source: PubMed Central journal article supplement — Clin Pharmacol Ther. 2019 Jul 26;106(6):1328–37. doi: 10.1002/cpt.1552 (PMC6896231; doi:10.1002/cpt.1552), 2019-07-26
Supplement: CPT-106-1328-s004.pdf [file CPT-106-1328-s004.pdf]

**Table S2 Star alleles previously reported by GeT-RM and not identified by Stargazer's analysis of whole genome sequencing data.**

| Star Allele | Assays <sup>a</sup> | Defining Variant <sup>b</sup> | Sample ID | GeT-RM <sup>c</sup>                        | Stargazer | WGS Evidence <sup>d</sup> |
|-------------|---------------------|-------------------------------|-----------|--------------------------------------------|-----------|---------------------------|
| CYP2A6*8    | [1, 2]              | rs28399468<br>(41349732C>A)   | NA12003   | *1/( <i>*8</i> )                           | *1/*1     | AD: C=49, A=0             |
|             |                     |                               | NA18855   | *1/( <i>*8</i> )                           | *1/*1     | AD: C=45, A=0             |
|             |                     |                               | NA19176   | *1/( <i>*8</i> )                           | *1/*1     | AD: C=27, A=0             |
| CYP2B6*27   | [1]                 | rs36079186<br>(41512918T>C)   | HG01190   | *1 ( <i>*5</i> )/ <i>*1</i> ( <i>*27</i> ) | *1/*5     | AD: T=40, C=0             |
|             |                     |                               | NA07029   | *6/( <i>*27</i> )                          | *1/*6     | AD: T=31, C=0             |
|             |                     |                               | NA07055   | *6/( <i>*27</i> )                          | *1/*6     | AD: T=35, C=0             |
|             |                     |                               | NA10851   | *1/*1 ( <i>*27</i> )                       | *1/*1     | AD: T=46, C=0             |
|             |                     |                               | NA18524   | *1/*1 ( <i>*27</i> )                       | *1/*1     | AD: T=44, C=0             |
|             |                     |                               | NA18959   | *1/*1 ( <i>*27</i> )                       | *1/*1     | AD: T=29, C=0             |
|             |                     |                               | NA19789   | *1/*1 ( <i>*27</i> )                       | *1/*1     | AD: T=36, C=0             |
| CYP2C9*18   | [2, 3]              | rs72558193<br>(96745830A>C)   | NA11832   | *1/*3 ( <i>*18</i> )                       | *1/*3     | AD: A=45, C=0             |
|             |                     |                               | NA11839   | *2/*3 ( <i>*18</i> )                       | *2/*3     | AD: A=59, C=0             |
|             |                     |                               | NA12813   | *1/*3 ( <i>*18</i> )                       | *1/*3     | AD: A=46, C=0             |
|             |                     |                               | NA18959   | *1/*3 ( <i>*18</i> )                       | *1/*3     | AD: A=38, C=0             |
|             |                     |                               | NA19917   | *1/*1 ( <i>*18</i> )                       | *1/*1     | AD: A=49, C=2             |
| GSTT1*AxN   | [2]                 | CN=3                          | NA18484   | ( <i>*A</i> /*AxN)                         | *A/*0     | CN=1                      |
|             |                     |                               | NA18519   | ( <i>*A</i> /*AxN)                         | *A/*0     | CN=1                      |
|             |                     |                               | NA18861   | ( <i>*A</i> /*AxN)                         | *A/*0     | CN=1                      |
|             |                     |                               | NA19095   | ( <i>*A</i> /*AxN)                         | *A/*0     | CN=1                      |
|             |                     |                               | NA19109   | ( <i>*A</i> /*AxN)                         | *A/*A     | CN=2                      |
|             |                     |                               | NA19174   | ( <i>*A</i> /*AxN)                         | *A/*A     | CN=2                      |
|             |                     |                               | NA19213   | ( <i>*A</i> /*AxN)                         | *A/*A     | CN=2                      |
| NA19920     | ( <i>*A</i> /*AxN)  | *A/*0                         | CN=1      |                                            |           |                           |

WGS, whole genome sequencing; AD, allelic depth; CN, copy number.

<sup>a</sup>[1] Affymetrix DMET Plus Array (Affymetrix, Santa Clara, CA); [2] Agena Bioscience iPLEX ADME PGx Pro Panel (Agena Bioscience, San Diego, CA); [3] Agena Bioscience iPLEX ADME CYP2C9 Panel (Agena Bioscience, San Diego, CA).

<sup>b</sup>Genomic coordinates and nucleotide changes are according to Human Genome version 19.

<sup>c</sup>“( )” indicates non-consensus GeT-RM genotypes.

<sup>d</sup>AD was assessed through visual inspection of WGS reads using Integrative Genomics Viewer.
