# Supplementary material for: Calling Star Alleles With Stargazer in 28 Pharmacogenes With Whole Genome Sequences
Source: PubMed Central journal article supplement — Clin Pharmacol Ther. 2019 Jul 26;106(6):1328–37. doi: 10.1002/cpt.1552 (PMC6896231; doi:10.1002/cpt.1552), 2019-07-26
Supplement: CPT-106-1328-s005.pdf [file CPT-106-1328-s005.pdf]

**Table S3 Structural variant reports in the Database of Genomic Variants supporting genotype calls from Stargazer over those from GeT-RM.**

| Star Allele       | Sample ID      | GeT-RM <sup>a</sup> | Stargazer  | Report ID   | Type                      | Source                               |
|-------------------|----------------|---------------------|------------|-------------|---------------------------|--------------------------------------|
| <i>CYP2A6*1x2</i> | NA18861        | *1/*1               | *25/*1x2   | gssvG19016  | CNV gain                  | DGV gold standard (multiple studies) |
| <i>CYP2A6*4</i>   | NA18565        | *9/*9               | *4/*15     | esv3644361  | CNV loss                  | 1KGP (Mills et al., 2011)            |
|                   | NA18942        | *1/*1               | *4/*7      | esv3644361  | CNV loss                  | 1KGP (Mills et al., 2011)            |
| <i>CYP2E1*7x2</i> | NA19908        | *7/*7               | *7x2/*7x2  | dgv172e214  | CNV gain                  | 1KGP (Mills et al., 2011)            |
| <i>CYP2E1*S1</i>  | NA19143        | (*7/*7)             | *7/*S1     | dgv8n64     | CNV gain                  | Wang et al, 2007                     |
| <i>GSTM1*0</i>    | NA10847        | *A/*A               | *A/*0      | esv3587155  | CNV loss                  | 1KGP (Mills et al., 2011)            |
|                   | NA12006        | *A/*A               | *A/*0      | esv3587155  | CNV loss                  | 1KGP (Mills et al., 2011)            |
|                   | NA12717        | *A/*A               | *A/*0      | esv3587155  | CNV loss                  | 1KGP (Mills et al., 2011)            |
|                   | NA18544        | *B/*B               | *B/*0      | esv3587155  | CNV loss                  | 1KGP (Mills et al., 2011)            |
|                   | NA18552        | *B/*B               | *B/*0      | esv3587155  | CNV loss                  | 1KGP (Mills et al., 2011)            |
|                   | NA18942        | *B/*B               | *B/*0      | esv3587155  | CNV loss                  | 1KGP (Mills et al., 2011)            |
|                   | NA18980        | *A/*A               | *A/*0      | esv3587155  | CNV loss                  | 1KGP (Mills et al., 2011)            |
|                   | NA18992        | *B/*B               | *B/*0      | esv3587155  | CNV loss                  | 1KGP (Mills et al., 2011)            |
|                   | NA19143        | *A/*A               | *A/*0      | esv3587155  | CNV loss                  | 1KGP (Mills et al., 2011)            |
|                   | NA19213        | *A/*A               | *A/*0      | esv3587155  | CNV loss                  | 1KGP (Mills et al., 2011)            |
|                   | NA19789        | *B/*B               | *B/*0      | esv3587155  | CNV loss                  | 1KGP (Mills et al., 2011)            |
|                   | NA19920        | *A/*A               | *A/*0      | esv3587155  | CNV loss                  | 1KGP (Mills et al., 2011)            |
|                   | NA20296        | *A/*A               | *A/*0      | esv3587155  | CNV loss                  | 1KGP (Mills et al., 2011)            |
|                   | <i>GSTT1*0</i> | HG00276             | (*A/*A)    | *A/*0       | esv3647425                | CNV loss                             |
| NA12003           |                | (*A/*A)             | *A/*0      | esv3647425  | CNV loss                  | 1KGP (Mills et al., 2011)            |
| NA12813           |                | (*A/*A)             | *A/*0      | esv3647425  | CNV loss                  | 1KGP (Mills et al., 2011)            |
| NA18519           |                | (*A/*AxN)           | *A/*0      | esv3647425  | CNV loss                  | 1KGP (Mills et al., 2011)            |
| NA18552           |                | (*A/*A)             | *A/*0      | esv3647425  | CNV loss                  | 1KGP (Mills et al., 2011)            |
| NA18861           |                | (*A/*AxN)           | *A/*0      | esv3647425  | CNV loss                  | 1KGP (Mills et al., 2011)            |
| NA18868           |                | (*A/*A)             | *A/*0      | esv3647425  | CNV loss                  | 1KGP (Mills et al., 2011)            |
| NA18959           |                | (*A/*A)             | *A/*0      | esv3647425  | CNV loss                  | 1KGP (Mills et al., 2011)            |
| NA18973           |                | (*A/*A)             | *A/*0      | esv3647425  | CNV loss                  | 1KGP (Mills et al., 2011)            |
| NA18980           |                | (*A/*A)             | *A/*0      | esv3647425  | CNV loss                  | 1KGP (Mills et al., 2011)            |
| NA19095           |                | (*A/*AxN)           | *A/*0      | esv3647425  | CNV loss                  | 1KGP (Mills et al., 2011)            |
| NA19908           | (*A/*A)        | *A/*0               | esv3647425 | CNV loss    | 1KGP (Mills et al., 2011) |                                      |
| NA19920           | (*A/*AxN)      | *A/*0               | esv3647425 | CNV loss    | 1KGP (Mills et al., 2011) |                                      |
| <i>SLC22A2*S2</i> | NA19226        | (*3/*3)             | *3/*S2     | gssvL111331 | CNV loss                  | DGV gold standard (multiple studies) |
|                   | NA19819        | *1/*3)              | *3/*S2     | gssvL111331 | CNV loss                  | DGV gold standard (multiple studies) |

DGV, Database of Genomic Variants; CNV, copy number variation; 1KGP, 1000 Genomes Project.

<sup>a</sup>“( )” indicates non-consensus GeT-RM genotypes.
