# Supplementary material for: Calling Star Alleles With Stargazer in 28 Pharmacogenes With Whole Genome Sequences
Source: PubMed Central journal article supplement — Clin Pharmacol Ther. 2019 Jul 26;106(6):1328–37. doi: 10.1002/cpt.1552 (PMC6896231; doi:10.1002/cpt.1552), 2019-07-26
Supplement: CPT-106-1328-s006.pdf [file CPT-106-1328-s006.pdf]

**Table S4 Demographic and sequencing information for 70 reference samples.**

| Sample ID | Population                        | Sequencing ID                     |
|-----------|-----------------------------------|-----------------------------------|
| HG00276   | European (Finnish)                | 20b87673c1224e9db8dbbbe82899309c  |
| HG00436   | East Asian (Southern Han Chinese) | 54db734bc1ec46b29fc6c5c6df35ca65  |
| HG00589   | East Asian (Southern Han Chinese) | 316ab006177d41b484982d7fa4d851ad  |
| HG01190   | American (Puerto Rican)           | 9e01734a352a41f89266c2ae8c9c13de  |
| NA06991   | European (Utah/Mormon)            | 82b808e2886a42f986da3ba811dbeaa4  |
| NA07000   | European (Utah/Mormon)            | 5d81e03c86324f209c69093ddf77bb62  |
| NA07019   | European (Utah/Mormon)            | dd864a425f814bca87a971eaf94cfa17  |
| NA07029   | European (Utah/Mormon)            | 28997710cbae49f5996f6075fcbf74bd  |
| NA07055   | European (Utah/Mormon)            | a9963d642c584dfab81f5ae694208390  |
| NA07056   | European (Utah/Mormon)            | 3a7ec2f78f3c40df98248d3ba1354a20  |
| NA07348   | European (Utah/Mormon)            | e92d97eb8a3f4c4db75faf9882b167    |
| NA07357   | European (Utah/Mormon)            | dd64f80e456a46e49555c0c7c30372b0  |
| NA10831   | European (Utah/Mormon)            | 021ab129bb594be5804b02e08e14d93d  |
| NA10847   | European (Utah/Mormon)            | e030f757080d4e5e841d8e7feef7a665  |
| NA10851   | European (Utah/Mormon)            | cb484635e004493fb395c764578797b   |
| NA10854   | European (Utah/Mormon)            | 7866e1bc7fddc4304863db4a25d1a42e4 |
| NA11832   | European (Utah/Mormon)            | 22d9ea3d16804243afbbe7e776c5237   |
| NA11839   | European (Utah/Mormon)            | c392e9300f6b490aa1c43f7ca7d7afd4  |
| NA11993   | European (Utah/Mormon)            | 20be9cf6bed64502b85c999ec59c784b  |
| NA12003   | European (Utah/Mormon)            | 141390df39414eaaaa9725a8349d9c45  |
| NA12006   | European (Utah/Mormon)            | 5f006ec8ba3c41a18d9ff92c0a62955a  |
| NA12145   | European (Utah/Mormon)            | 45e24be4dc7d4cb3a2742ce7c05730e8  |
| NA12156   | European (Utah/Mormon)            | 69d7b11affce444694e9955b90848028  |
| NA12717   | European (Utah/Mormon)            | 3959a73552a04f969d37a04dc869c7a9  |
| NA12813   | European (Utah/Mormon)            | 2c9f234af9b4f6a970d8def07358e5    |
| NA12873   | European (Utah/Mormon)            | def4a73760dd42d38b17c33cdeb654b   |
| NA18484   | African (Yoruba)                  | 3ddccd4bcd41410b3e89559d2cf3186   |
| NA18509   | African (Yoruba)                  | d84c8e4613064299b2a16cfa39d819b5  |
| NA18518   | African (Yoruba)                  | e1ddd983797640bf81b66f9a77b37439  |
| NA18519   | African (Yoruba)                  | 20aaa40fcdde4290bfada8dbba5e5232  |
| NA18524   | East Asian (Han Chinese)          | ba64fb6dbb0a4b36a5cbe53bd8706ca7  |
| NA18526   | East Asian (Han Chinese)          | 7d077b89f2514fb0b8e002f8d9a10189  |
| NA18540   | East Asian (Han Chinese)          | f00e1071f8402476c9872de37f0ea8a02 |
| NA18544   | East Asian (Han Chinese)          | ecf7d003ffef4d249351037cb97bac09  |
| NA18552   | East Asian (Han Chinese)          | 5bb329dcb3654e8890985547e82135f6  |
| NA18564   | East Asian (Han Chinese)          | 4323a15d7b5d4bf2b204e0c0088ba923  |
| NA18565   | East Asian (Han Chinese)          | b859eb68840b42d9a376ce22cfff1cd08 |
| NA18617   | East Asian (Han Chinese)          | 0b7cc95044c54d86a81151d856d0c5b2  |
| NA18855   | African (Yoruba)                  | 03bc76a2c27140bc8143c56767ca6877  |
| NA18861   | African (Yoruba)                  | 543558ae08cd44b3850fc7b835484037  |
| NA18868   | African (Yoruba)                  | 2b0b4c79e8104ed98ef5cc82d9ca8bd2  |
| NA18942   | East Asian (Japanese)             | bda28ac619e64916b0a28d1f2698e2e   |
| NA18952   | East Asian (Japanese)             | 92ac6c0f69345aab9b9e7d47452ed70   |
| NA18959   | East Asian (Japanese)             | 7fddcb4bdabe743feb4abc155bc580b82 |
| NA18966   | East Asian (Japanese)             | f52c133442ca4f93a47b689fc385b1f5  |
| NA18973   | East Asian (Japanese)             | 11a1c7b37a63449f9bc65799567b5710  |
| NA18980   | East Asian (Japanese)             | 7a29e8a53b6844d4bb42aa165b34fba3  |
| NA18992   | East Asian (Japanese)             | b7988ee8179d4678921602d34400a63a  |
| NA19003   | East Asian (Japanese)             | e968235bb8e14f02af53e2f17cee324f  |
| NA19007   | East Asian (Japanese)             | 6320750d96f747b695f78964df1fad17  |
| NA19095   | African (Yoruba)                  | 75331ab394f24d56ac73cee5d41fa15b  |
| NA19109   | African (Yoruba)                  | 8f90214c429f4afc9e0da555cb77f89a  |
| NA19122   | African (Yoruba)                  | 9e3dcd083ad40dd82fab180a916fb77   |
| NA19143   | African (Yoruba)                  | dfe4ba40717d4891a12ec2c856de671f  |
| NA19147   | African (Yoruba)                  | 6b9f68c07c3e4e3e81669fe390ba1027  |
| NA19174   | African (Yoruba)                  | b462b7941e0642309d5d44e7aae6d42f  |
| NA19176   | African (Yoruba)                  | d7b5cf7015d44c23a949dc117c149c80  |
| NA19178   | African (Yoruba)                  | 3fcca708192c4ffe8e57318c7d64e480  |
| NA19207   | African (Yoruba)                  | 7a94709935ea412e8b7349828beaf338  |
| NA19213   | African (Yoruba)                  | a284eb8f85e4b0ba3c45e30e91a33a1   |
| NA19226   | African (Yoruba)                  | db923feb258241b8b0a3e3aaada9359b  |
| NA19239   | African (Yoruba)                  | 69335e244b5f46e5b56e5360f8f826b7  |
| NA19789   | American (Mexican-American)       | 932a3f4c888844c39399f1cfd72bc593  |
| NA19819   | African (African-American)        | a04f109738f3a358850f5f69d7d8814   |
| NA19908   | African (African-American)        | 0d73bafef55a4a718489f3fdca91fd55  |
| NA19917   | African (African-American)        | 2176d8cef950450bb29052359a2d2d1   |
| NA19920   | African (African-American)        | 228fa4f74dd4431f8eb3526f37e355ed  |
| NA20296   | African (African-American)        | 34b739132d0e403d9aa323b1c3edf12a  |
| NA20509   | European (Toscani in Italy)       | b51b8299a62f4a3eab95d0467e950b7e  |
| NA21781   | unknown (Caucasian)               | e246a44270e34d2aa228844732995abe  |
